# Supplementary material for: Targeting galectin-3 with a high-affinity antibody for inhibition of high-grade serous ovarian cancer and other MUC16/CA-125-expressing malignancies
Source: PubMed Central journal article supplement (PMC7881041; doi:10.1038/s41598-021-82686-3), 2021-02-12
Supplement: 41598_2021_82686_MOESM1_ESM.pdf [file 41598_2021_82686_MOESM1_ESM.pdf]

TARGETING GALECTIN-3 WITH A HIGH-AFFINITY ANTIBODY FOR INHIBITION OF  
HIGH GRADE SEROUS OVARIAN CANCER AND OTHER MUC16/CA-125-EXPRESSING  
MALIGNANCIES

Marina Stasenکو,<sup>1,2§</sup> Evan Smith,<sup>1,§</sup> Oladapo Yeku,<sup>4,5</sup> Kay J Park,<sup>1,6</sup> Ian Laster<sup>4</sup>, Kwangkook Lee<sup>4,5</sup>, Sven Walderich,<sup>7</sup> Elizabeth Spriggs,<sup>8</sup> Bo Rueda<sup>9,10</sup>, Britta Weigelt,<sup>1</sup> Dmitriy Zamarin,<sup>11,12</sup> Thapi Dharma Rao,<sup>3τ</sup> David R Spriggs<sup>4,5τ\*</sup>

<sup>1</sup>Gynecology Service, Department of Surgery, Memorial Sloan Kettering Cancer Center, New York, NY, 10065

<sup>2</sup>Division of Gynecologic Oncology, Department of Obstetrics and Gynecology, NYU Langone Health, New York, NY, 10016

<sup>3</sup>Department of Medical Oncology, Monoclonal Antibody Core, Dana-Farber Cancer Institute, Boston, MA, 02215

<sup>4</sup>Division of Hematology-Oncology, Massachusetts General Hospital, Boston, MA, 02114

<sup>5</sup>Department of Medicine, Harvard Medical School, Boston, MA, 02114

<sup>6</sup>Department of Pathology, Memorial Sloan Kettering Cancer Center, New York, NY 10065

<sup>7</sup>Department of Medicine, University of California San Francisco Medical Center, San Francisco, CA, 94143

<sup>8</sup>Elizabeth Spriggs, Arnold Arboretum, Boston MA, 02131

<sup>9</sup>Vincent Center for Reproductive Biology, Department of Obstetrics and Gynecology, Massachusetts General Hospital, Boston, MA, 02114

<sup>10</sup>Department of Obstetrics and Gynecology and Reproductive Biology, Harvard Medical School, Boston, MA, 02114

<sup>11</sup>Gynecologic Medical Oncology Service, Department of Medicine, Memorial Sloan Kettering Cancer Center, New York, NY, 10065

<sup>12</sup>Department of Medicine, Weill Cornell Medical College, New York, NY, 10065

§These two authors contributed equally to this work

τThese two authors contributed equally to this work

**\*Corresponding author:**

David R. Spriggs, MD  
Director of Gynecologic Cancer Program  
Massachusetts General Hospital  
Harvard Medical School  
55 Fruit St  
Boston, MA 02114  
646-787-5920  
[dspriggs@mgh.harvard.edu](mailto:dspriggs@mgh.harvard.edu)

TABLE OF CONTENTS

Figure S1 Expression of LGALS3 and CA125 (MUC16) in human ovarian cancer cell lines

Figure S2 Surface Plasmon Resonance study of Anti-Gal3 monoclonal antibody, 14D11, binding to Gal3

Figure S3 Validation of siRNA knockdowns for Galectin 1 and Galectin 3, including cropped (A) and original (Figure 2A) (B) Uncropped Western Blots.

Figure S4 Western Blots (FIGURE 4B) with (B) uncropped originals

Table S1. Immunization Schedules for each antibody campaign

## **SUPPLEMENTAL FIGURE LEGENDS**

**Supplemental Figure 1S. Expression of LGALS3 and CA125 (MUC16) in human ovarian cancer cell lines.** OVCAR3 and SKOV3<sup>c344</sup> cell lines were stained for extracellular MUC16 and intracellular LGAL3 and evaluated via flow cytometry.

**Supplemental Figure S2. Anti-Gal3 monoclonal antibody, 14D11, demonstrates binding to Gal3.** **A.** Binding of antibody to human galectin-3 (R&D Systems; Minneapolis, MN) by surface plasmon resonance (SPR; GE Biacore; Pittsburgh, PA) according methods described by Mehta-D'souza et al (33). The antibodies to be tested were bound to a gold chip activated with mouse Fc receptor. Galectin-3 (R and D Systems) was used as ligand and delivered at a constant flow rate. 1D1 was used as a isotype control antibody without desired characteristics. **B.** A series of increasing concentrations Gal3 and analysis to fit the binding curves. The dissociation constant for the 14D11 antibody was estimated as 14.6 nM.

**Supplemental Figure S3: Uncropped Western Blots.** **A.** Cropped Western Blot (from Figure 2A) confirming silencing of *LGALS3* in the *LGALS3* knockdown cell line, sh*LGALS3*-MDA-MB-231 and confirming silencing of *LGALS1* in the *LGALS1* knockdown cell line, sh*LGALS1*-MDA-MB-231.  $\beta$ -Actin normalized densitometry quantification values are shown below each Western blot band. **B.** Uncropped Western Blots

**Supplemental Figure 4S:** Cropped Western Blot (Figure 4B) showing the effect of 14D11 on MUC16-mediated activation of ERK/AKT signaling in MUC16-expressing A2780<sup>c114</sup>, A2780<sup>c344</sup>, SKOV3<sup>c114</sup> and SKOV3<sup>c344</sup> cells after 48-h exposure to antibody. MUC16-negative A2780 and SKOV3 cells were used as controls.  $\beta$ -Actin normalized densitometry quantification values are shown below each western blot band. **B.** Uncropped Western Blots

**Supplemental Table 1:** Immunization schedules used for the three separate immunization campaigns to generate anti-galectin 3 monoclonal antibodies.

Supplemental Figure 1: Expression of MUC16 and Galectin-3

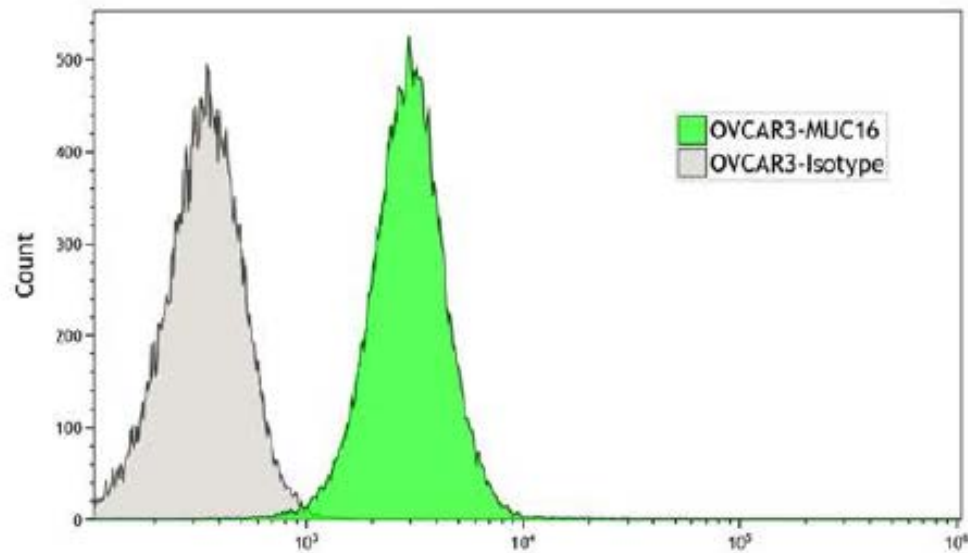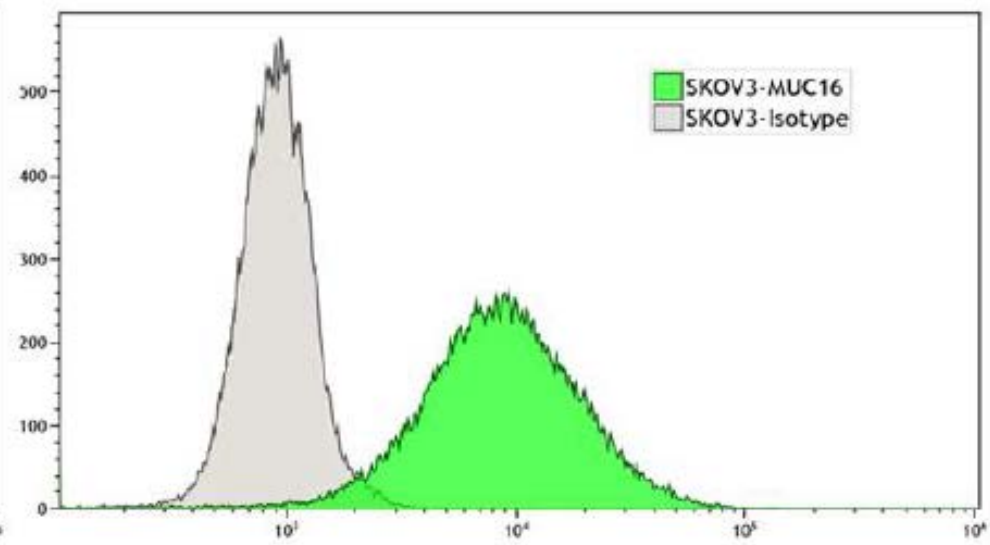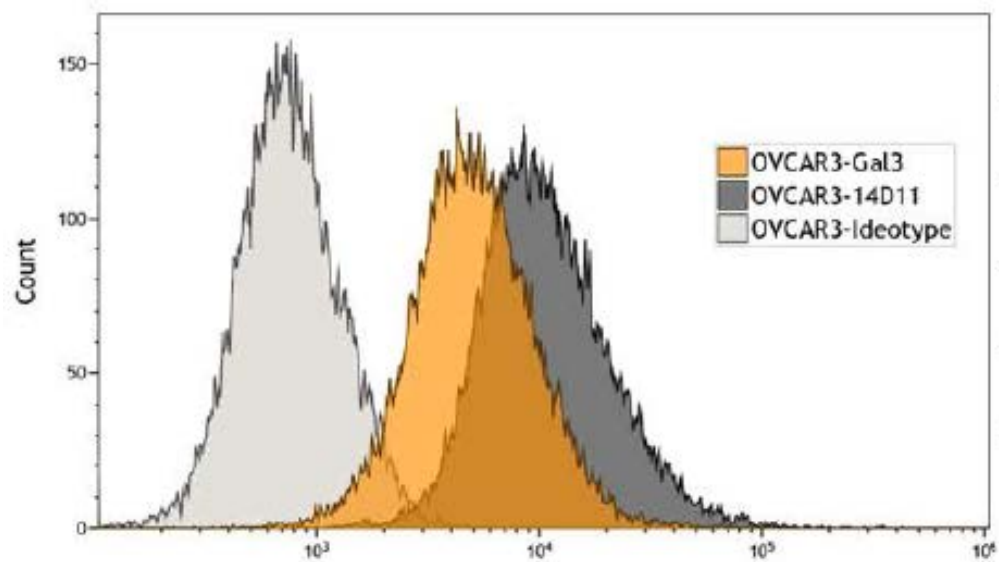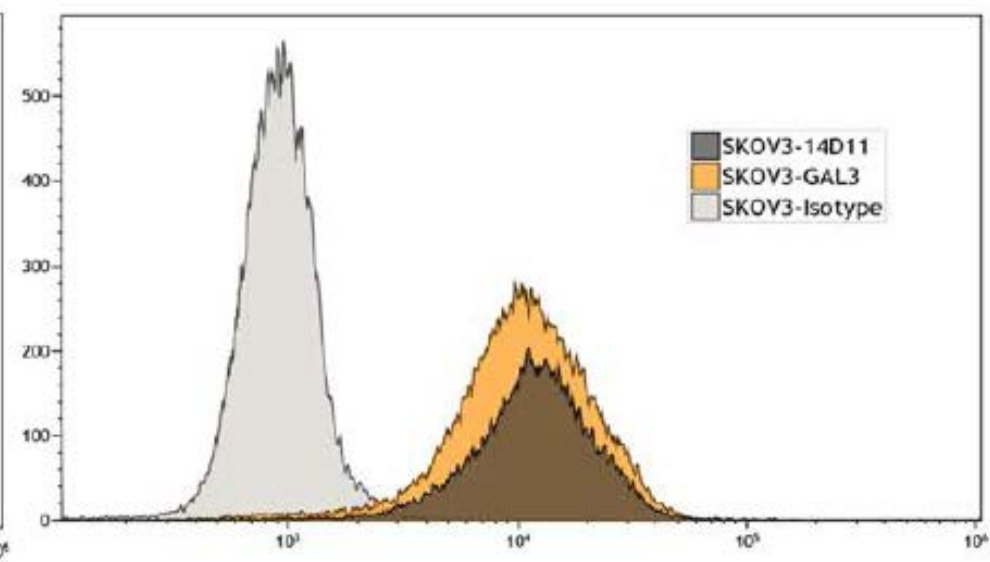

SUPPLEMENTAL FIGURE S2

A.

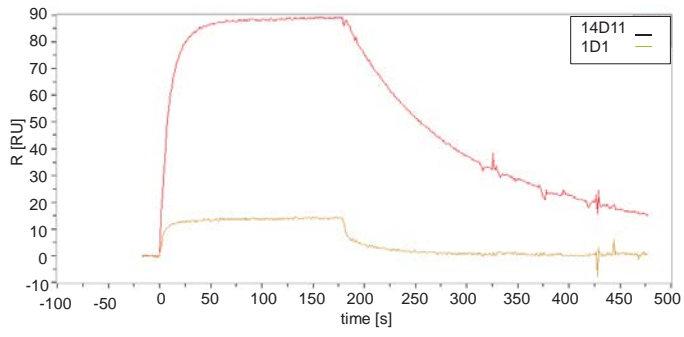

B.

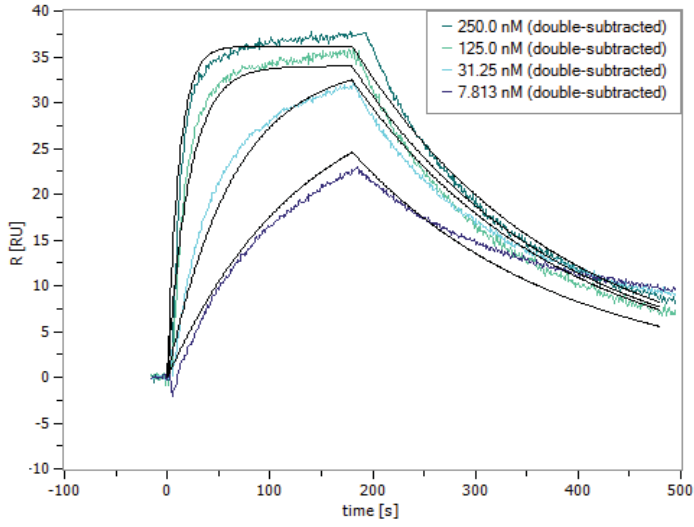



SUPPLEMENTAL FIGURE S3

**A****MDA-MB-231 TGL**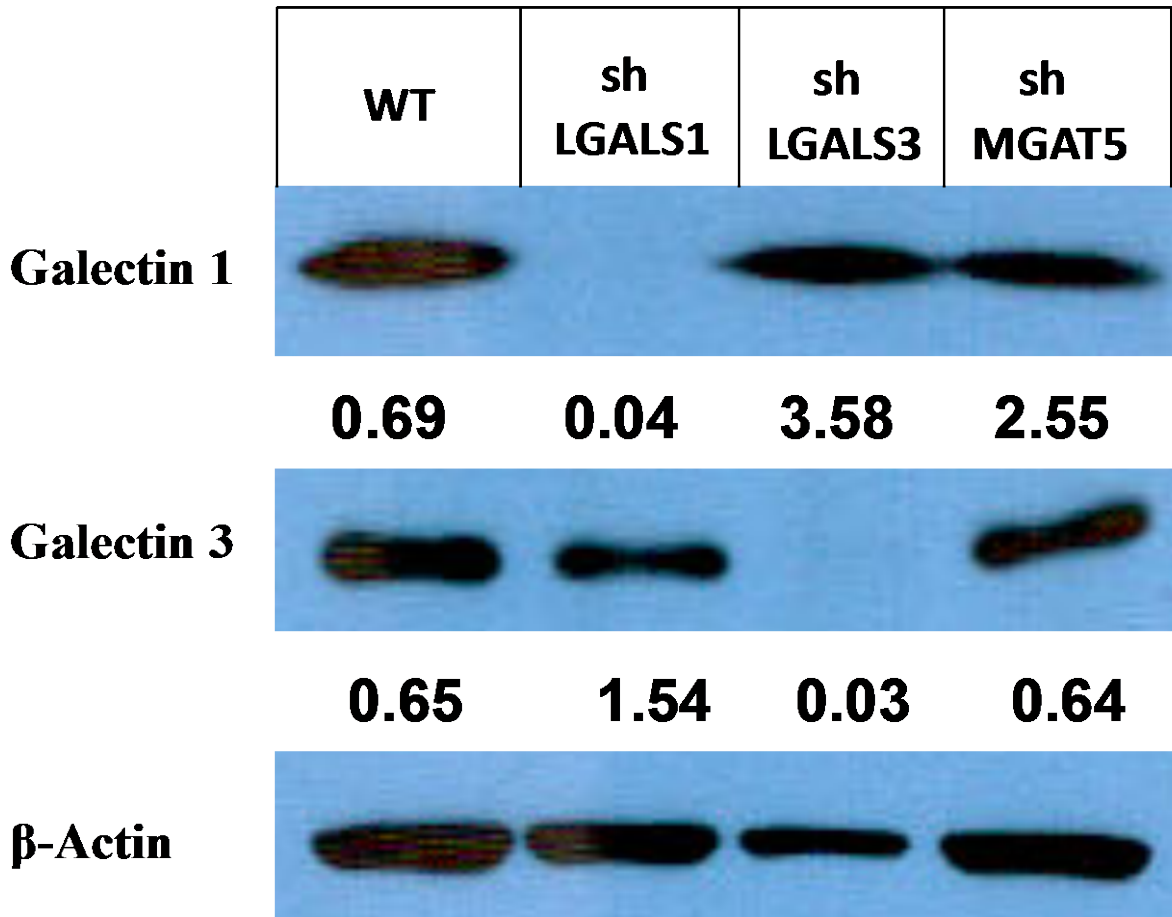**B****Galectin-1  
blot**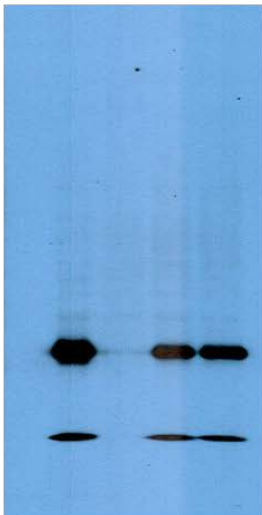**Galectin-3  
blot**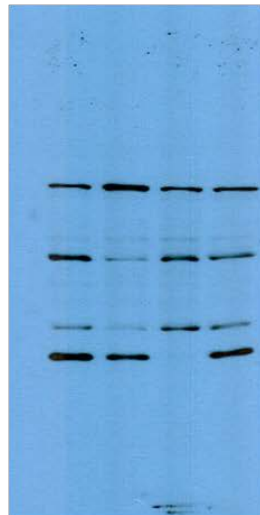**β-Actin  
blot**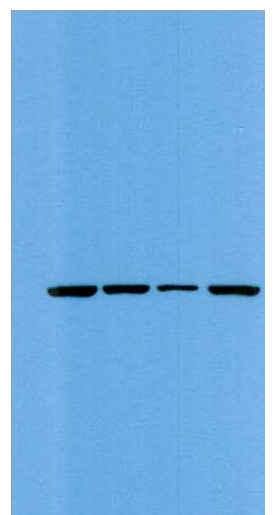

→

→

→

SUPPLEMENTAL FIGURE S4

**A**

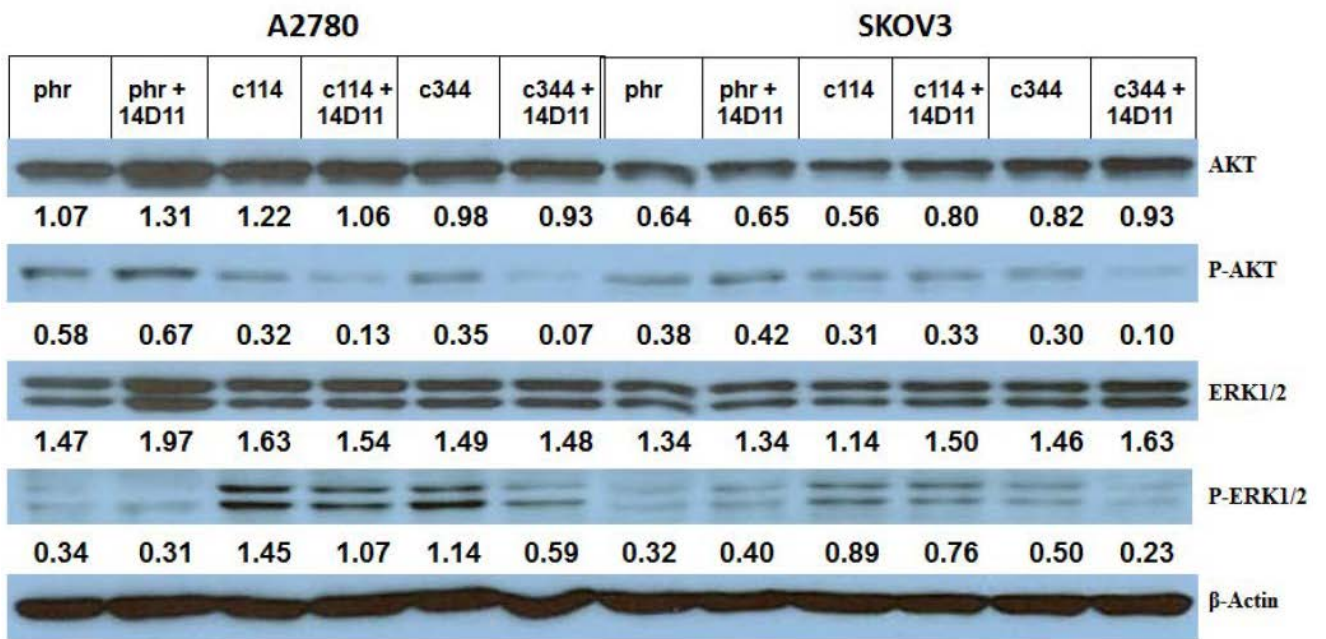

**B**

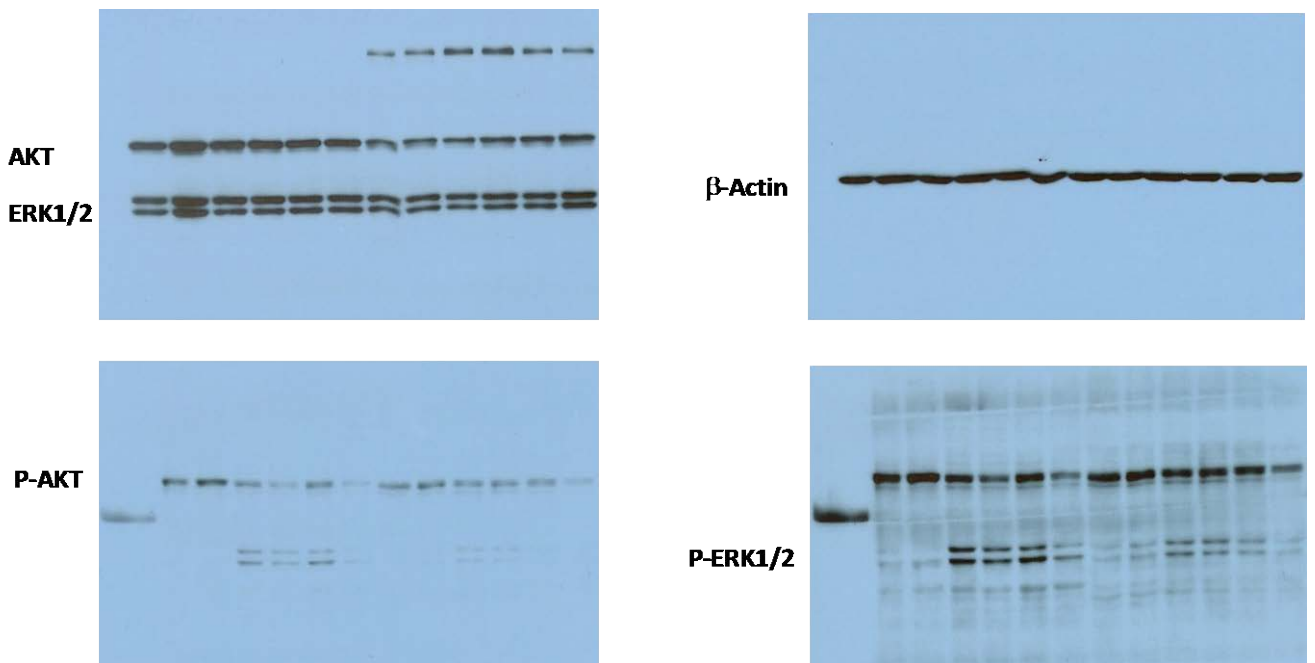

SUPPLEMENTAL TABLE S1

| Date              | Immunogen                             | Amount ug          | Route Of Injection | Sera Id    | Bleed Date |
|-------------------|---------------------------------------|--------------------|--------------------|------------|------------|
| <b>Campaign 1</b> |                                       |                    |                    |            |            |
| 7/22/2016         | LGals3 - Fc Fusion                    | 50ug               | SC (CpG+adjuvant)  | Pre immune | 7/22/2016  |
| 8/12/2016         | LGals3 - Fc Fusion                    | 50ug               | SC (with adjuvant) | TB1        | 8/19/2016  |
| 9/2/2016          | LGals3 - Fc Fusion                    | 50ug               | SC (with adjuvant) | TB2        | 9/9/2016   |
| 9/19/2016         | LGals3 - Fc Fusion                    | 50ug               | SC (with adjuvant) | TB3        | 9/26/2016  |
| 10/10/2016        | LGals3 - Fc Fusion                    | 50ug (M2 M3)       | SC (with adjuvant) | TB4        | 10/17/2016 |
| 10/18/2016        | LGALS3 Protein                        | 50 ug (M1, M4, M5) | SC (with adjuvant) | TB4        | 10/25/2016 |
| 10/31/2016        | LGALS3 Protein                        | 5ug                | SC (with adjuvant) | TB5        | 11/7/2016  |
| <b>Campaign 2</b> |                                       |                    |                    |            |            |
| 12/2/2016         | Peptide - LGALS3 binding domain       | 50 ug              | SC (with adjuvant) | TB6        | 12/9/2016  |
| 12/23/2016        | Peptide - LGALS3 binding domain       | 50ug               | SC (with adjuvant) | TB7        | 12/30/2016 |
| 1/13/2017         | Peptide - LGALS3 binding domain       | 50 ug              | SC (with adjuvant) | TB8        | 1/20/2017  |
| 4/7/2017          | LGALS3 N-Terminus Peptide             | 50 ug              | SC (with adjuvant) | TB9        | 4/14/2017  |
| 5/2/2017          | LGALS3 N-Terminus Peptide             | 50 ug              | SC (with adjuvant) | TB10       | 5/9/2017   |
| 5/23/2017         | LGALS3 N-Terminus Peptide             | 50 ug              | SC (with adjuvant) | TB11       | 5/30/2017  |
| 6/26/2017         | LGALS3 N-Terminus Peptide             | 5 ug (M1)          | IV - tail vein     | Terminal   | 6/29/2017  |
| 6/26/2017         | Peptide - LGALS3 binding domain       | 5 ug (M1)          | IV - tail vein     | Terminal   | 6/30/2017  |
| <b>Campaign 3</b> |                                       |                    |                    |            |            |
| 12/16/2016        | LGALS3 conserved region Peptide 1-KLH | 20 ug              | SC (with adjuvant) | Pre-immune | 12/15/2016 |
| 12/30/2016        | LGALS3 conserved region Peptide 1-KLH | 50ug               | SC (with adjuvant) | TB1        | 1/6/2017   |
| 1/20/2017         | LGALS3 conserved region Peptide 1-KLH | 50 ug              | SC (with adjuvant) | TB2        | 1/27/2017  |
| 2/21/2017         | LGALS3 conserved region Peptide 1-KLH | 10 ug              | IV - tail vein     | Terminal   | 2/24/2017  |
| 4/7/2017          | LGALS3 N-Terminus Peptide 9-KLH       | 50 ug              | SC (with adjuvant) | TB3        | 4/14/2017  |
| 5/2/2017          | LGALS3 N-Terminus Peptide 9-KLH       | 50 ug              | SC (with adjuvant) | TB4        | 5/9/2017   |
| 5/23/2017         | LGALS3 N-Terminus Peptide 9-KLH       | 50 ug              | SC (with adjuvant) | TB5        | 5/30/2017  |
| 6/26/2017         | LGALS3 N-Terminus Peptide 9-KLH       | 5 ug (M2)          | IV - tail vein     | Terminal   | 6/30/2017  |
